# Supplementary material for: Conventional type-1 DC density is associated with checkpoint inhibitor response across multiple types of cancer
Source: JCI journal article supplement (doi:10.1172/jci200987), 2026-05-01
Supplement: sd1 [file 1]

## 1 **Supplementary files**

### 2 **Supplementary methods**

#### 3 RNAseq datasets

#### 4 Clinical characteristics of the IMmotion150 cohort

5 The IMmotion150 trial (ClinicalTrials.gov: NCT01984242) was a Phase II study targeting  
6 patients diagnosed with metastatic renal cell carcinoma (mRCC) who had not undergone  
7 prior systemic therapy (1,2). Participants were divided into three groups: 77 patients  
8 received atezolizumab (anti-PD-L1) alone, 85 were treated with a combination of  
9 atezolizumab and bevacizumab (anti-VEGF), while 85 patients were treated with sunitinib.  
10 In our analysis, we have combined the two groups treated with immunotherapy. Among the  
11 162 patients treated with immunotherapy, six achieved a complete response (CR, 3.60%),  
12 40 had a partial response (PR, 24.69%), 62 experienced stable disease (SD, 38.27%), and  
13 54 showed disease progression (PD, 33.33%).

14 The median progression-free survival (PFS) was 8.10 months in the immunotherapy group,  
15 with an interquartile range (IQR) of 18.69 - 2.79 months. Among the patients treated with  
16 sunitinib, 2 achieved CR (2.35%), 26 PR (30.58%), 36 SD (42.35%) and 21 PD (24.70%).  
17 Median PFS in the sunitinib arm was 7.13 months with IQR= 16.59 - 4.37.

#### 18 Clinical characteristics of the IMbrave150 cohort

19 The IMbrave150 trial (ClinicalTrials.gov: NCT03434379) was a pivotal Phase III study  
20 evaluating the efficacy of atezolizumab (anti-PD-L1) in combination with bevacizumab  
21 (anti-VEGF) versus sorafenib as first-line therapy for patients with unresectable  
22 hepatocellular carcinoma (HCC) (3). Most patients were in stage B or C, reflecting  
23 advanced disease. Of the total 314 patients in the immunotherapy arm, we have selected  
24 those who had a confirmed status of response (290), with RNA sequencing performed pre-  
25 treatment. Of these, 25 patients reached a complete response (8.62%), 65 partial response  
26 (22.41%), 123 stable disease (42.41%) and 77 progression disease (26.55%). Median OS in

27 the immunotherapy arm was 9.15 months (OS), with an interquartile range of 6.51 to 12.07.  
28 Median PFS in the immunotherapy arm was 5.55 months (p25- p75: 2.03 - 9.50). From the  
29 total number of patients treated with sorafenib, we have selected 48 with response to  
30 treatment available. None of patients reached CR, 10 patients with PR (20.83%), 24 with SD  
31 (50%) and 14 with PD (29.16%). Median OS in the sorafenib arm was 8.46 months (p25-p  
32 75: 5.64 - 9.82) and median PFS was 4.23 months (p25-p75: 1.55 - 7.55).

### 33 Clinical characteristics of the POPLAR cohort

34 This Phase II study (ClinicalTrials.gov: NCT01903993) evaluated the efficacy of  
35 Atezolizumab versus docetaxel in patients with previously treated non-small-cell lung  
36 cancer (NSCLC) (4). Before immunotherapy, most participants underwent platinum-based  
37 chemotherapy, as it is a standard first-line treatment for NSCLC. We have selected those  
38 patients with confirmed response status. In the immunotherapy arm (87 patients selected),  
39 one reached complete response (1.11%), 12 partial response (13.79%), 40 patients with  
40 stable disease (45.97%) and 34 with progression (39.08%). Median overall survival was  
41 11.10 months (p25-p75: 5.48 - 25.63). Median progression-free survival was 2.80 (p25-p75:  
42 1.40 - 8.53). Among patients treated with docetaxel (86 selected with confirmed status  
43 response), none of them achieved CR (0%), 16 PR (18.60%), 35 SD (40.69%) and 35 PD  
44 (40.69%). Median OS in docetaxel arm was 9.38 with IQR = 16.07 - 4.21 and median PFS of  
45 3.36 months with IQR = 6.75 - 1.38.

### 46 Clinical characteristics of the OAK cohort

47 The OAK trial (ClinicalTrials.gov: NCT02008227) was a Phase III study evaluating the  
48 efficacy of atezolizumab compared to docetaxel in patients with previously treated, locally  
49 advanced, or metastatic NSCLC with platinum-based chemotherapy (5). From 344 patients  
50 of the atezolizumab arm, we selected patients with confirmed response status (318) and  
51 classified them based on their response to treatment: four achieved CR (1.25%), 44 PR  
52 (13.83%), 111 SD (34.98%) and 159 PD (50%). Median overall survival was 10.77 months in

53 the atezolizumab arm (p25-p75: 5.48 - 25.63) and median progression-free survival was  
54 2.80 (p25-p75: 1.40 - 8.53). From the docetaxel arm, 315 patients were annotated with  
55 confirmed response to treatment and classified by their response: None with CR (0%), 42  
56 with PR (13.33%), 158 SD (50.15%) and 115 with PD (36.50%). Median OS in docetaxel arm  
57 was 9.10 months (p25-p75: 4.59 - 19.25) and median PFS of 3.25 months (p25-p75: 1.57 -  
58 5.70).

#### 59 Clinical characteristics of the Gide et.al cohort

60 Gide et al. (6) investigated immune responses in patients with metastatic melanoma,  
61 comparing anti-PD-1 monotherapy (e.g., pembrolizumab or nivolumab) and combination  
62 therapy with anti-PD-1 and anti-CTLA-4 (ipilimumab). Out of 120 patients, 63 received  
63 monotherapy and 57 combination therapy. This analysis focused on 72 patients whose  
64 sequencing before treatment. Among them, 13 achieved CR (18.05%), 26 PR (36.11%), 11  
65 SD (15.27%), and 22 PD (30.55%). Median overall survival was 20.53 months (IQR: 29.57 -  
66 8.35), with a median PFS of 12.4 months (IQR: 24.03 - 2.73).

#### 67 Clinical characteristics of the Ríaz et.al cohort

68 Riaz et al. (7) conducted a study focusing in patients with metastatic melanoma treated  
69 with immune checkpoint blockade therapy. Specifically, the study included patients who  
70 had either progressed on ipilimumab (anti-CTLA-4) or were ipilimumab-naive, and all  
71 patients subsequently received nivolumab (anti-PD-1) as part of the CA209-038 clinical  
72 trial. The research aimed to understand the evolution of both the tumor and its  
73 microenvironment during treatment with anti-PD1 therapy. In this analysis, we focused only  
74 on patients whose transcriptomic sequencing was performed before treatment and with  
75 confirmed annotated response status (49 patients). Of these, 10 patients achieved PRCR  
76 response (20.40%), 16 SD (32.65%) and 23 PD (46.93%). Median OS was 17.28 months with  
77 IQR = 29.83 - 7.85.

#### 78 Clinical characteristics of the IMvigor210 cohort

79 The IMvigor210 (8) (ClinicalTrials.gov: NCT02108652) was a multicenter, single-arm, phase  
80 II clinical trial designed to evaluate the efficacy and safety of atezolizumab in patients with  
81 locally advanced or metastatic urothelial carcinoma (mUC). The trial comprised two  
82 distinct cohorts: The first one included patients who were cisplatin ineligible and had not  
83 received prior treatment for mUC. The second cohort consisted of patients with mUC who  
84 had experienced disease progression following platinum-based chemotherapy. We will not  
85 distinguish between the two cohorts in this analysis. A total of 208 patients underwent RNA  
86 sequencing prior to treatment. Patients OS was 9.24 months (p25 - p75: 4.12 - 20.07).  
87 Median PFS was 2.10 months (p25 - p75: 2.00 - 6.34).

88

#### 89 References

- 90 1. Powles T, Atkins MB, Escudier B, Motzer RJ, Rini BI, Fong L, et al. Efficacy and  
91 Safety of Atezolizumab Plus Bevacizumab Following Disease Progression on  
92 Atezolizumab or Sunitinib Monotherapy in Patients with Metastatic Renal Cell Carcinoma  
93 in IMmotion150: A Randomized Phase 2 Clinical Trial. *Eur Urol.* 2021;79:665–73.
- 94 2. McDermott DF, Huseni MA, Atkins MB, Motzer RJ, Rini BI, Escudier B, et al. Clinical  
95 activity and molecular correlates of response to atezolizumab alone or in combination  
96 with bevacizumab versus sunitinib in renal cell carcinoma. *Nat Med.* 2018;24:749–57.
- 97 3. Finn RS, Qin S, Ikeda M, Galle PR, Ducreux M, Kim T-Y, et al. Atezolizumab plus  
98 Bevacizumab in Unresectable Hepatocellular Carcinoma. *N Engl J Med.* 2020;382:1894–  
99 905.
- 100 4. Fehrenbacher L, Spira A, Ballinger M, Kowanetz M, Vansteenkiste J, Mazieres J, et  
101 al. Atezolizumab versus docetaxel for patients with previously treated non-small-cell lung  
102 cancer (POPLAR): a multicentre, open-label, phase 2 randomised controlled trial. *The*  
103 *Lancet.* 2016;387:1837–46.
- 104 5. Rittmeyer A, Barlesi F, Waterkamp D, Park K, Ciardiello F, Von Pawel J, et al.  
105 Atezolizumab versus docetaxel in patients with previously treated non-small-cell lung  
106 cancer (OAK): a phase 3, open-label, multicentre randomised controlled trial. *The Lancet.*  
107 2017;389:255–65.
- 108 6. Gide TN, Quek C, Menzies AM, Tasker AT, Shang P, Holst J, et al. Distinct Immune  
109 Cell Populations Define Response to Anti-PD-1 Monotherapy and Anti-PD-1/Anti-CTLA-4  
110 Combined Therapy. *Cancer Cell.* 2019;35:238-255.e6.
- 111 7. Riaz N, Havel JJ, Makarov V, Desrichard A, Urba WJ, Sims JS, et al. Tumor and  
112 Microenvironment Evolution during Immunotherapy with Nivolumab. *Cell.* 2017;171:934-  
113 949.e16.

114 8. Rosenberg JE, Hoffman-Censits J, Powles T, Van Der Heijden MS, Balar AV, Necchi  
115 A, et al. Atezolizumab in patients with locally advanced and metastatic urothelial  
116 carcinoma who have progressed following treatment with platinum-based chemotherapy:  
117 a single-arm, multicentre, phase 2 trial. *The Lancet*. 2016;387:1909–20.

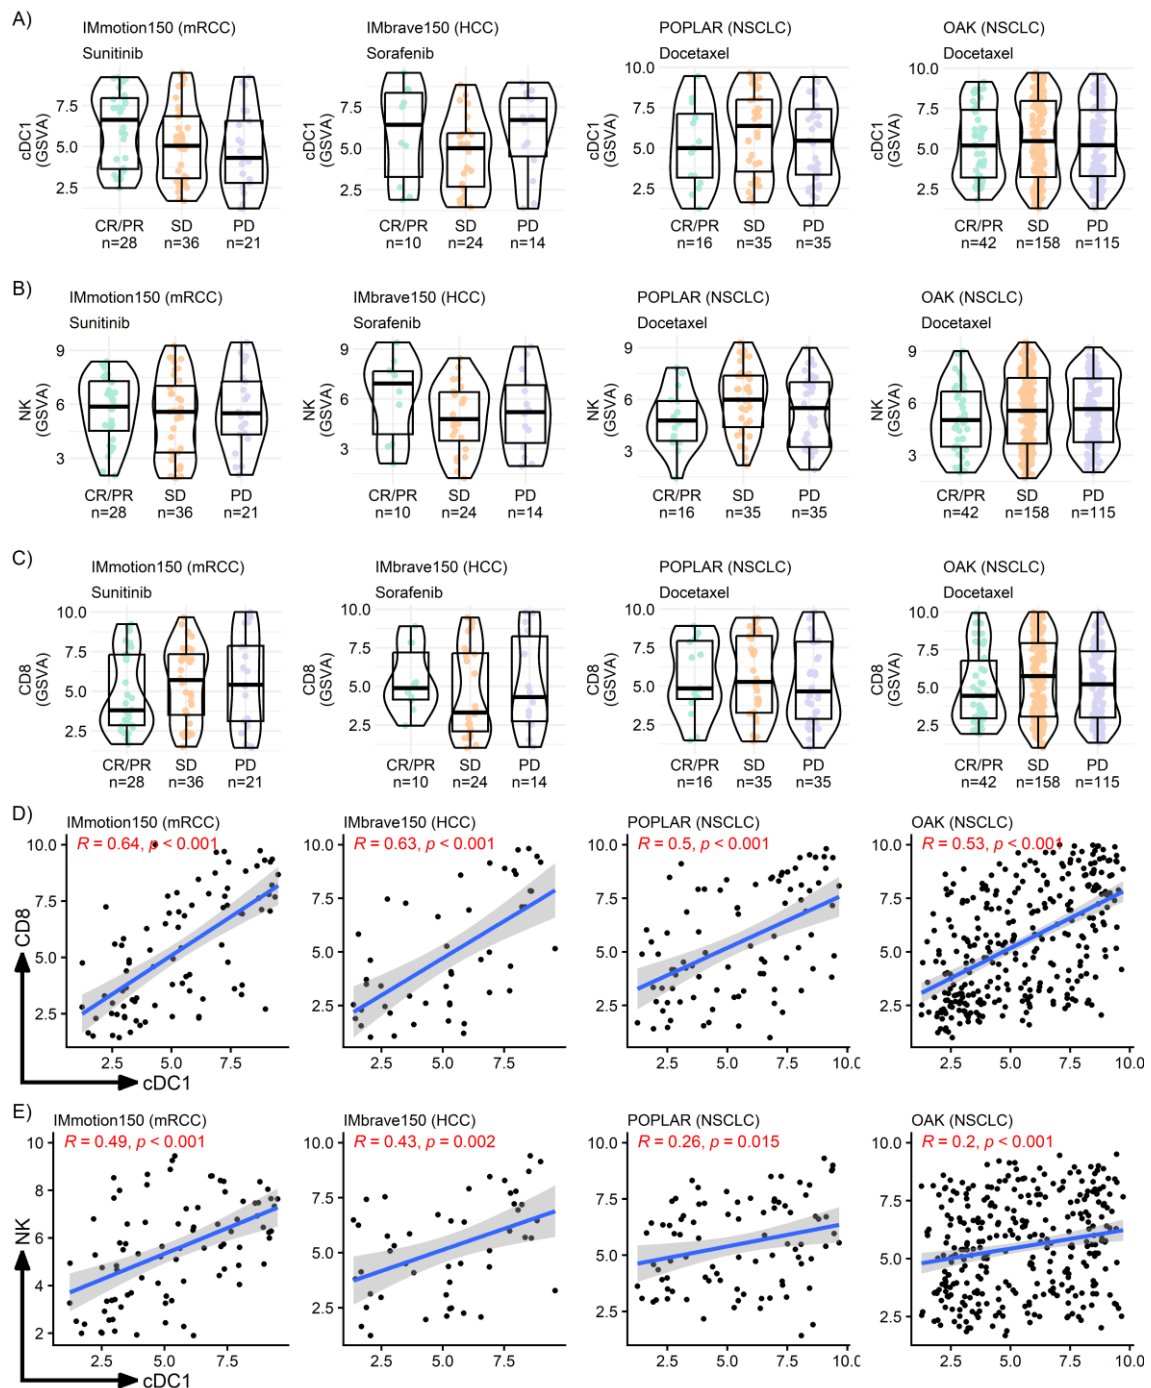

118

119 **Supplementary figure 1 Non immunotherapy control arms in the indicated clinical**  
 120 **trials show a lack of association of the cDC1 signature with clinical benefit whilst the**  
 121 **correlations with CD8 and NK infiltration are preserved. (A to C) Data as in figure 1**  
 122 **representing the gene signatures for cDC1, CD8 and NK cells in patients classified**  
 123 **according to clinical benefit from arms that did not receive immunotherapy. (D to E)**  
 124 **Represent the statistical correlations (according to Pearson correlation coefficient) of**

125 gene expression in patients' tumor samples of the cDC1 gene signature with the NK and  
 126 CD8 signatures. The p values are calculated according to linear regression. Shaded area  
 127 represents the confidence intervals for each linear regression line.

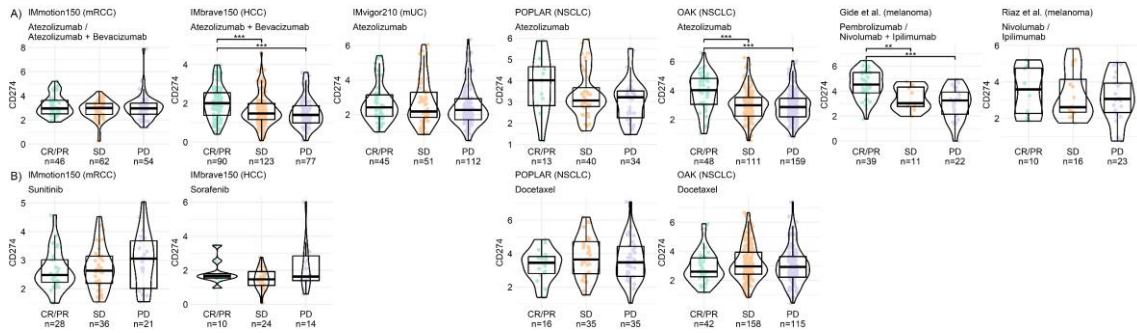

128

129 **Supplementary figure 2. Studies on the associations of PDL1 mRNA expression**

130 **(CD274) with clinical outcome.** Data represents associations of PDL1 in some but not all

131 the trials testing checkpoint inhibitors **(A)** and in no OAK series of those patients treated with

132 targeted therapy or taxane chemotherapy in the corresponding control arms **(B)**. Asterisks

133 indicate p values for comparisons according to Wilcoxon significance tests: \* <0.05,

134 \*\*<0.01, \*\*\*<0.001.

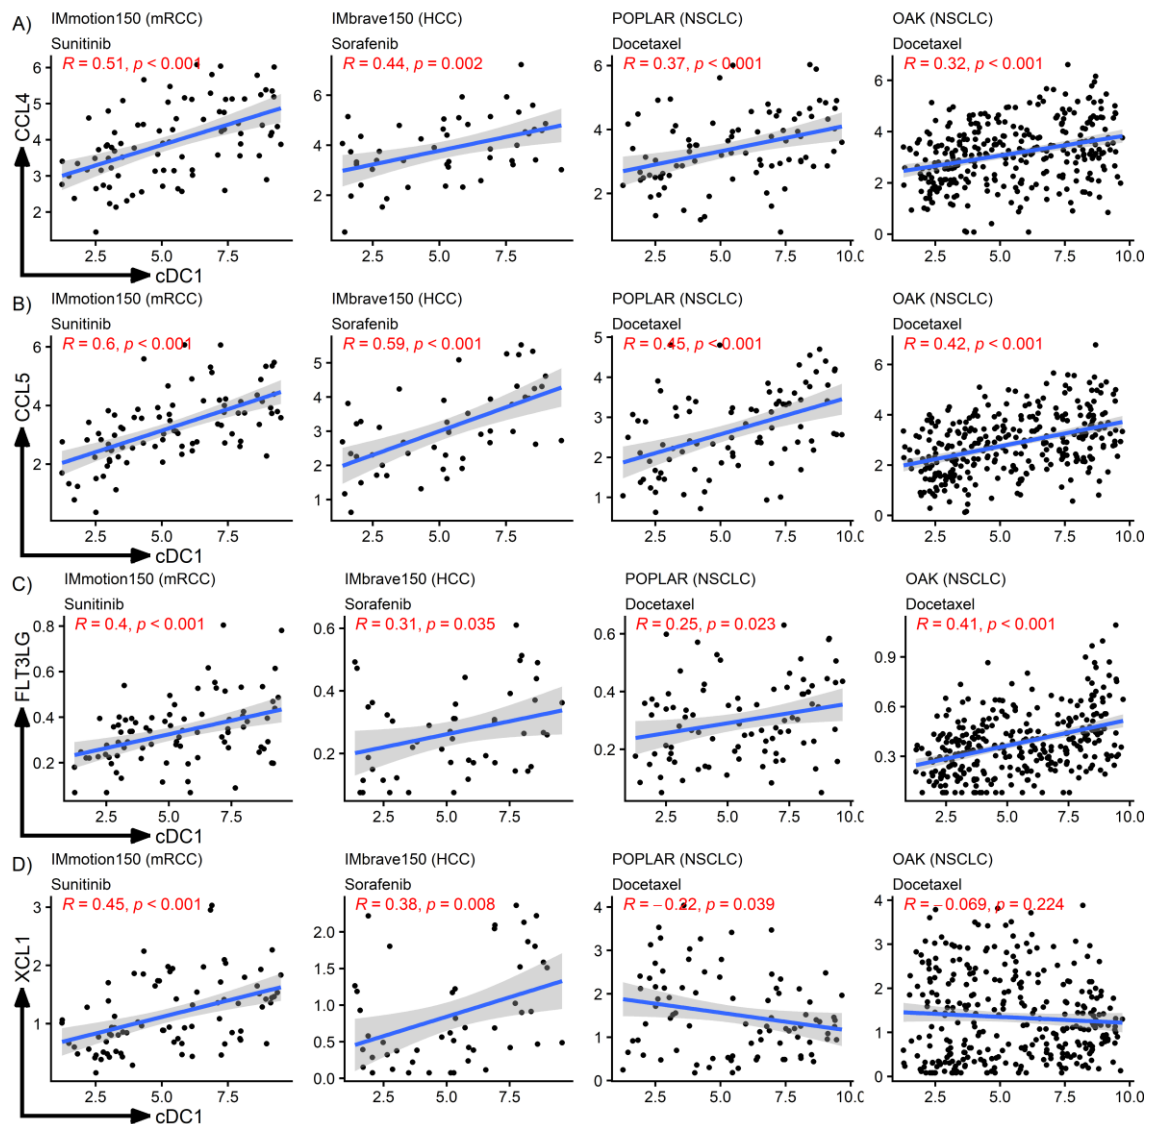

135

136 **Supplementary figure 3 The transcripts for CCL4, CCL5 and FLT3LG correlate with**  
 137 **cDC1 also in the series of patients treated with targeted therapy or chemotherapy**  
 138 **across the trials. (A to C) Data as in figure 2 in which the indicated transcripts in tumors**  
 139 **from patients treated in the non-immunotherapy arms across trials were studied for the**  
 140 **association with the cDC1 signature as indicated. In (D) a variable association with XCL1**  
 141 **was noted. All correlation indexes refer to Pearson correlation. The p values are calculated**  
 142 **according to linear regression. Shaded area represents the confidence intervals for each**  
 143 **linear regression line.**

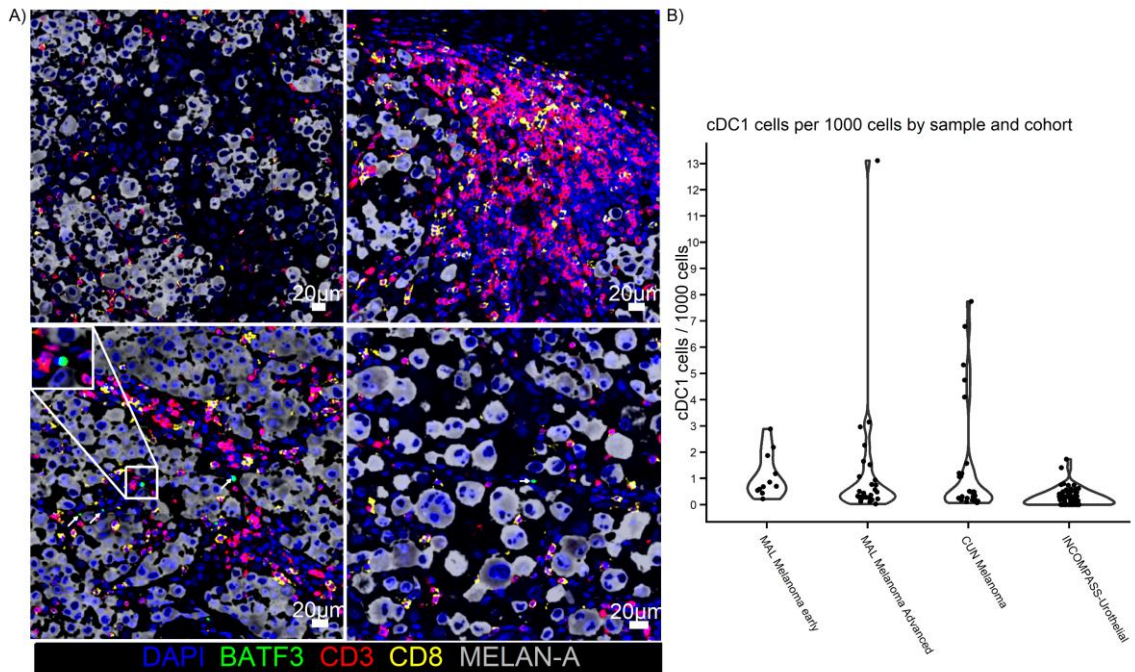

144

145 **Supplementary figure 4. Representative microphotographs as those analyzed in figure**

146 **4.**

147 **A)** Four representative microphotographs of different patterns of cDC1 and T-cell

148 lymphocyte tumor infiltration from the CUN melanoma cohort. Upper left: Area devoid of

149 cDC1, and only occasional T-cells. Upper right: Area with a high-density T cell infiltration

150 but absence of cDC1 cells. Lower left: Area with occasional BATF3+ cDC1 cells in close

151 proximity to T cells. Inset and white arrows indicate BATF3+ cDC1 cells. Lower right: Area

152 with an isolated BATF3+ cDC1 cell (white arrow) and very few infiltrating T cells. B) Number

153 of cDC1 BATF3+ cells per 1000 cells analyzed across cohorts.

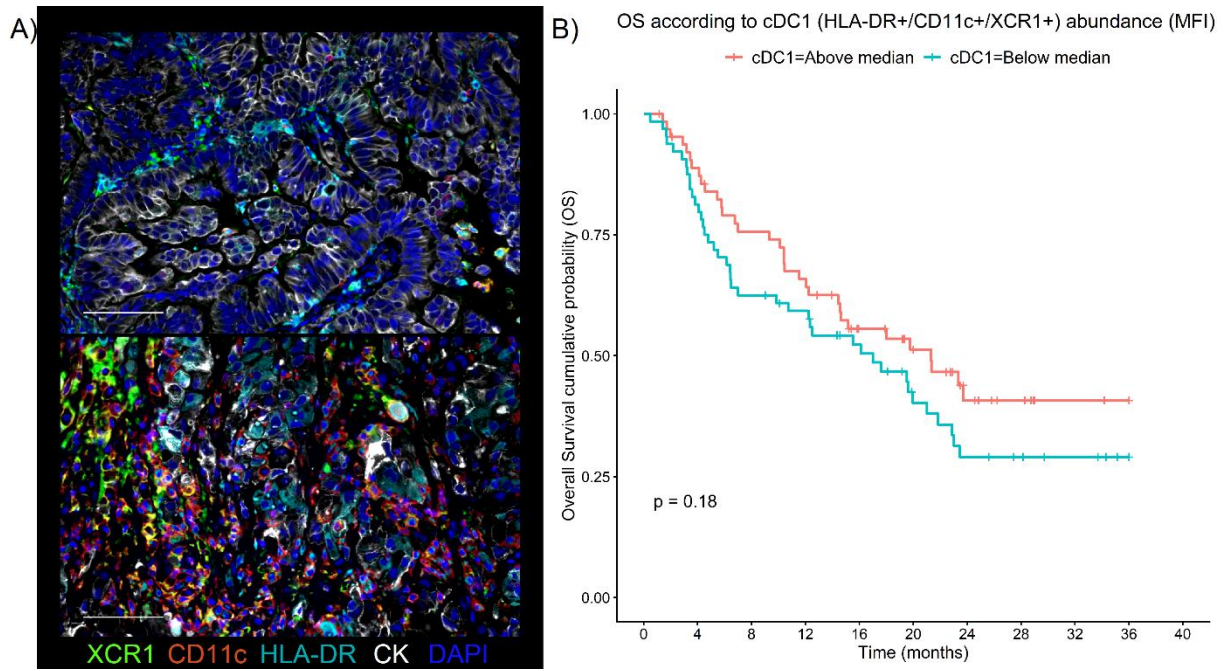

154

155 **Supplementary figure 5. Multiplex immunofluorescence analyses of NSCLC samples**  
 156 **from patients treated with immunotherapy show a positive association between cDC1**  
 157 **density and Overall Survival.** A) Representative microphotographs of NSCLC samples  
 158 demonstrating low and high density of cDC1. Scale bar = 100  $\mu$ m. B) Kaplan-Meier plot  
 159 demonstrating association between cDC1 density and overall survival.

A)

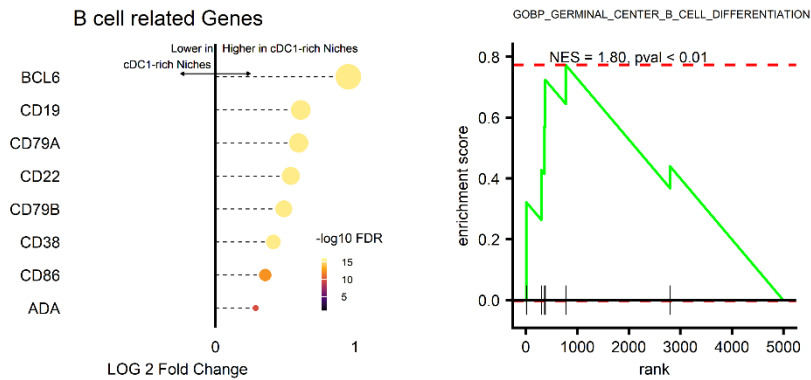

B)

Correlation between BATF3 mRNA expression with individual gene mRNA expression in the tumor compartment

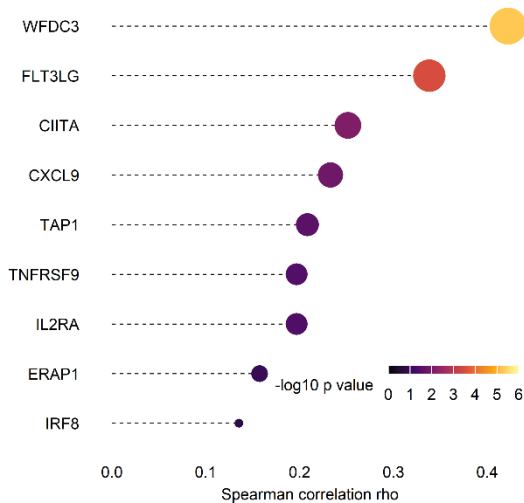

C)

OS according to BATF3 mRNA expression in tumor compartment

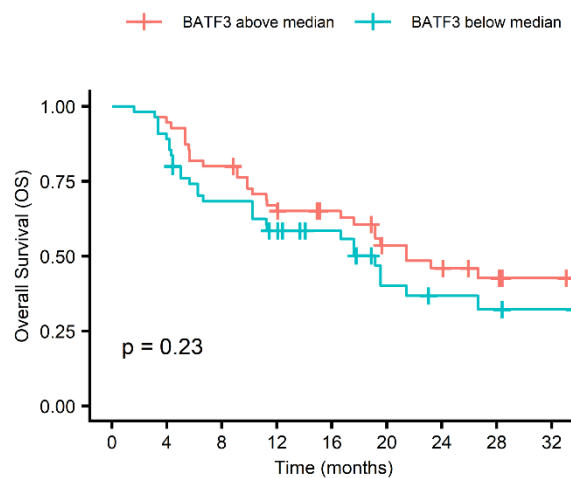

160

161 **Supplementary figure 6. cDC1 niche analysis reveals increased B lymphocyte activity**

162 **in cDC1 rich samples. GeoMX spatial transcriptomic analysis of NSCLC samples from**

163 **immunotherapy treated patients demonstrates an association of cDC1 specific**

164 **transcript spatial abundance with immunoregulatory genes and survival. A) Niche**

165 **results illustrating selected B lymphocyte associated transcripts that are differentially**

166 **overexpressed in cDC1 rich niche. GSEA enrichment plot revealing upregulation of**

167 **germinal center associated pathway. In the left panel, point sizes reflect fold change**

168 **values. B) Spearman correlation analysis between BATF3 mRNA expression in the tumor**

169 **compartment and key immune function associated transcripts. C) Kaplan-Meier analysis**

170 **revealing a positive non-significant association between BATF3 mRNA expression in the**

171 **tumor compartment and overall survival.**

172

173 **Supplementary table 1**

| <b>Cohort</b>               | <b>Tumor type</b>       | <b>Tumor stage</b>  | <b>Sample Size</b> | <b>Treatment received</b>                                                | <b>Endpoint</b>                                               | <b>Sample Obtention</b> | <b>Sample type</b>   |
|-----------------------------|-------------------------|---------------------|--------------------|--------------------------------------------------------------------------|---------------------------------------------------------------|-------------------------|----------------------|
| CUN<br>Melanoma             | Melanoma                | Advanced/Metastatic | 30                 | Nivolumab±Ipilimumab                                                     | Radiologic response at 12 months per RECIST 1.1 criteria      | Pre-treatment           | Whole Slide          |
| MAL<br>Melanoma<br>Advanced | Melanoma                | Advanced/Metastatic | 20                 | Nivolumab /<br>Pembrolizumab+TKI /<br>Nivolumab+Ipilimumab               | Progression before 3 months / No<br>progression for 12 months | Pre-treatment           | Whole Slide          |
| MAL<br>Melanoma<br>Early    | Melanoma                | Early stage         | 11                 | Nivolumab /<br>Pembrolizumab                                             | Progression before 3 months / No<br>progression for 12 months | Pre-treatment           | Whole Slide          |
| INCOMPASS-<br>Urothelial    | Urothelial<br>carcinoma | Advanced/Metastatic | 34                 | Atezolizumab                                                             | Best radiologic response per RECIST<br>1.1 criteria           | Pre-treatment           | Tissue<br>Microarray |
| YALE-NSCLC                  | NSCLC                   | Advanced/Metastatic | 130                | Atezolizumab /<br>Pembrolizumab /<br>Nivolumab /<br>Nivolumab+Ipilimumab | Overall Survival                                              | Pre-treatment           | Tissue<br>Microarray |

174 FU: Follow-up

175
